# Supplementary material for: Morphology-tuned MnOx/TiO2 nanocatalysts for recycling PET plastic waste using biomass-derived ethylene glycol
Source: Royal Society of Chemistry journal article supplement (doi:10.1039/d4nr05373g), 2025-01-01
Supplement: d4nr05373g1.pdf [file d4nr05373g1.pdf]

## Supporting Information

### **Morphology-tuned MnO<sub>x</sub>/TiO<sub>2</sub> nanocatalysts for recycling PET plastic waste with biomass-derived ethylene glycol**

Bhattu Swapna<sup>a</sup>, Madam Bobby Barnabas<sup>a</sup>, Pragya Moni Gogoi<sup>b</sup>, Pankaj Bharali<sup>b</sup>, Giridhar Madras<sup>c</sup>, Putla Sudarsanam<sup>a,\*</sup>

<sup>a</sup>Department of Chemistry, Indian Institute of Technology Hyderabad, Kandi 502284, Telangana, India

<sup>b</sup>Department of Chemical Sciences, Tezpur University, Napaam 784028, Assam, India

<sup>c</sup>Department of Chemical Engineering, Indian Institute of Technology Hyderabad, Kandi 502284, Telangana, India

**\*Email: sudarsanam.putla@chy.iith.ac.in**

## 1. Characterization studies of the catalysts and BHET monomer

The NMR spectra ( $^1\text{H}$ ,  $^{13}\text{C}$ , and DEPT  $135^\circ$ ) were obtained using a Bruker Avance III 400 MHz/54 mm FT-NMR spectrophotometer to confirm the formation of BHET qualitatively. The molecular weight of the BHET monomer was confirmed by the high-resolution mass spectrum (HR-MS) instrument (Agilent 6538 UHD Q-TOF) in electron spray ionization mode contains the sodium metal ionization ( $\text{Na}^+$ ) and potassium metals ( $\text{K}^+$ ) at atmospheric pressure chemical ionization. Powder XRD analysis was conducted utilizing a Malvern PANalytical non-ambient XRD Empyrean-DY2584 equipped with 45 kW & 40 mA to elucidate crystal planes and phases of  $\text{TiO}_2$  and  $\text{MnO}_x$ . The Ni-filtered  $\text{Cu K}\alpha$  radiation was used as the X-ray source. The TEM analysis of  $\text{TiO}_2$  and  $\text{MnO}_x/\text{TiO}_2$ -NR materials was conducted on a JEOL (JEM F200) instrument with a 200 kV accelerating voltage electron beam to determine the particle size, shape, and dispersion of  $\text{MnO}_x$  and  $\text{TiO}_2$  particles. A carbon-coated copper grid with a 200-mesh size was employed for TEM analysis. The specific surface areas, pore sizes, and pore volumes of pristine  $\text{TiO}_2$  and  $\text{MnO}_x/\text{TiO}_2$  catalysts were evaluated by  $\text{N}_2$  adsorption-desorption analysis at  $-196^\circ\text{C}$  (liquid  $\text{N}_2$  temperature). The measurements were performed on an Autosorb iQ Station 1 instrument, employing the Brunauer-Emmett-Teller (BET) method and Barrett-Joyner-Halenda (BJH) model. Before analysis, all samples underwent vacuum drying at  $200^\circ\text{C}$  for 2 h to remove physisorbed species.

The XPS analysis was conducted under ultra-high vacuum conditions on an AXIS Supra with  $\text{Al K}\alpha$  radiation to determine the oxidation states of Mn, Ti, and O as well as the changes in their binding energies. The charge correction of the binding energies of Mn, Ti, and O of the catalysts was executed using the adventitious carbon at 284.6 eV. The  $\text{CO}_2$ -TPD measurements were carried out using a ChemBET Pulsar automatic chemisorption analyzer (MAKE Quantachrome Instruments), which was equipped with diffusion-type oxidation and  $\text{CO}_2$ -resistant TCD filaments. The fits were generated and analyzed by the in-built analyzer 'Quantachrome TPRWin v4.10'. The catalysts were pretreated at  $120^\circ\text{C}$  for 30 min under a He flow and then cooled to  $40^\circ\text{C}$ , followed by  $\text{CO}_2$  adsorption with pure  $\text{CO}_2$  (99.9% purity) at a flow rate of  $50\text{ mL min}^{-1}$  for 20 min. The amount of basic sites was estimated by measuring the amount of  $\text{CO}_2$  desorbed by increasing the temperature to  $800^\circ\text{C}$  with ramping of  $10^\circ\text{C min}^{-1}$ .

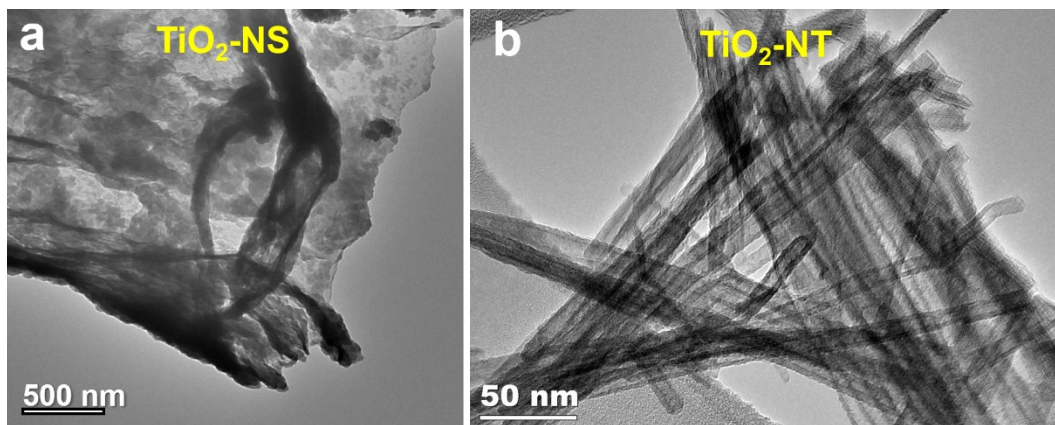

**Fig. S1.** TEM images of (a) TiO<sub>2</sub> nanosheets (NS) and (b) TiO<sub>2</sub> nanotubes (NT).

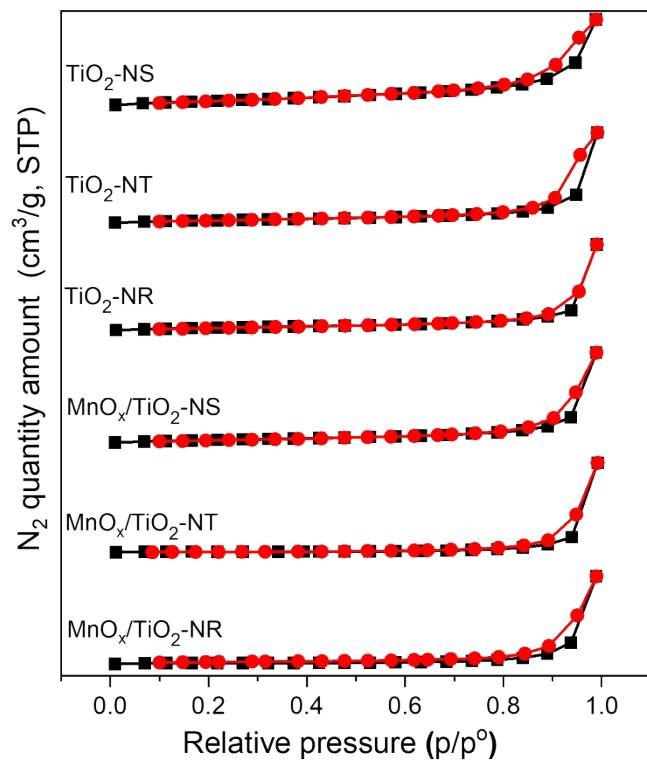

**Fig. S2.** N<sub>2</sub> adsorption-desorption isotherms of TiO<sub>2</sub> and MnO<sub>x</sub>/TiO<sub>2</sub> catalysts.

**Table S1:** BET surface area, average pore volume, and average pore size of TiO<sub>2</sub> and MnO<sub>x</sub>/TiO<sub>2</sub> nanocatalysts.

| S. No. | Catalyst                               | BET surface area (m <sup>2</sup> /g) | Pore volume (cm <sup>3</sup> /g) | Pore size (nm) |
|--------|----------------------------------------|--------------------------------------|----------------------------------|----------------|
| 1      | TiO <sub>2</sub> -NS                   | 198                                  | 0.604                            | 26.13          |
| 2      | TiO <sub>2</sub> -NT                   | 185                                  | 0.575                            | 25.20          |
| 3      | TiO <sub>2</sub> -NR                   | 129                                  | 0.414                            | 25.11          |
| 4      | MnO <sub>x</sub> /TiO <sub>2</sub> -NS | 152                                  | 0.326                            | 25.06          |
| 5      | MnO <sub>x</sub> /TiO <sub>2</sub> -NT | 138                                  | 0.288                            | 25.14          |
| 6      | MnO <sub>x</sub> /TiO <sub>2</sub> -NR | 94                                   | 0.307                            | 26.18          |

SP-BS-1-BHET.1.fid  
SP-BS-1-BHET-1H

# <sup>1</sup>H NMR BHET

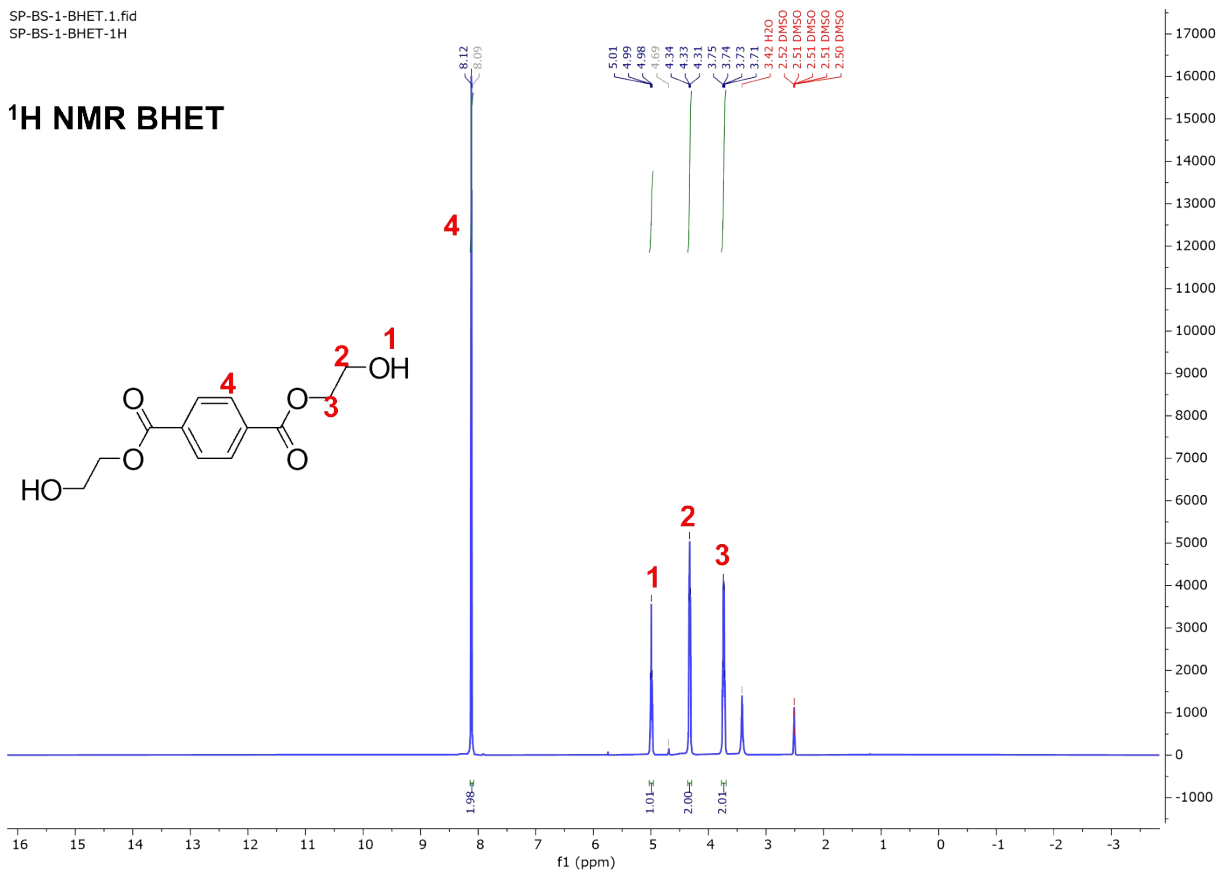

Fig. S3. <sup>1</sup>H NMR analysis of BHET monomer.

SP-BS-1-BHET.2.fid  
SP-BS-1-BHET-13C

### <sup>13</sup>C NMR BHET

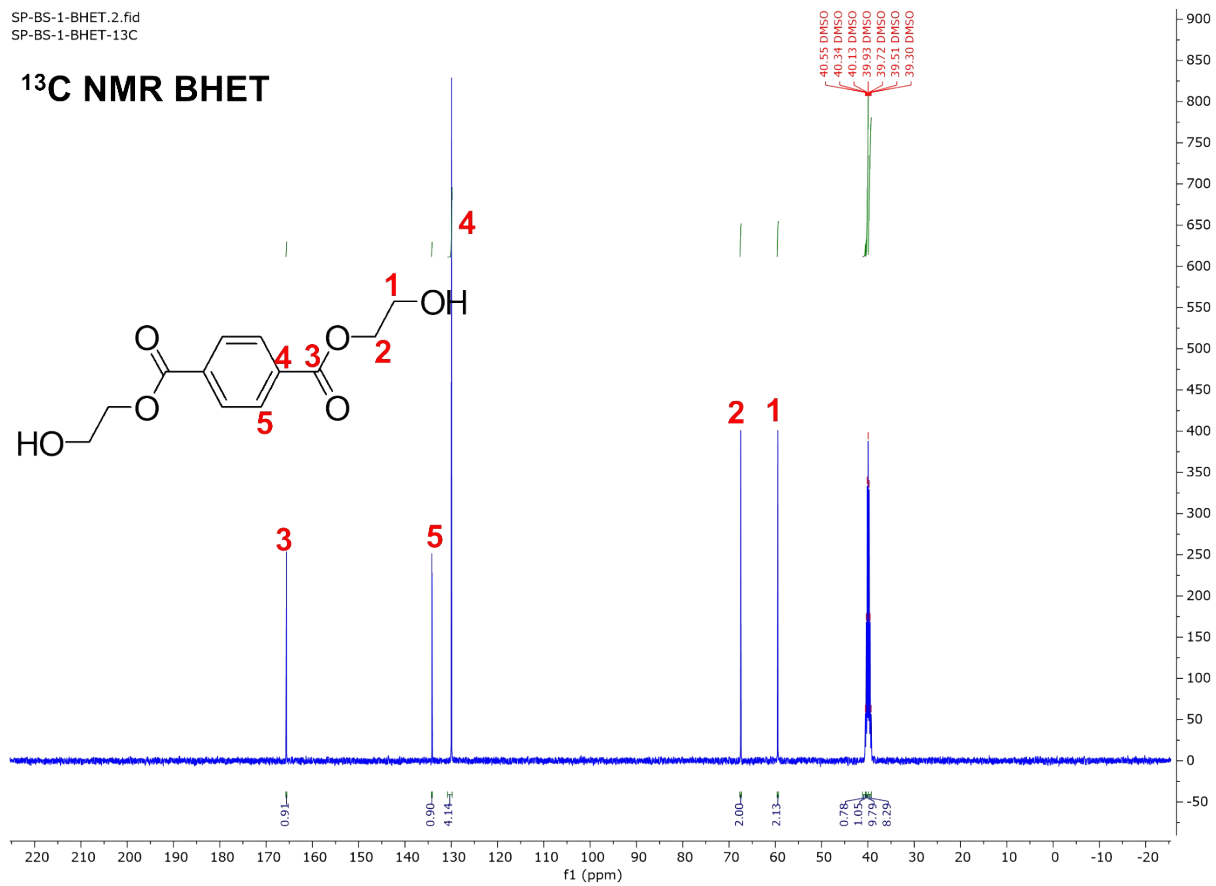

**Fig. S4.** <sup>13</sup>C NMR analysis of BHET monomer.

SP-BS-1-BHET.3.fid  
SP-BS-1-BHET-DEPT

### DEPT-135 BHET

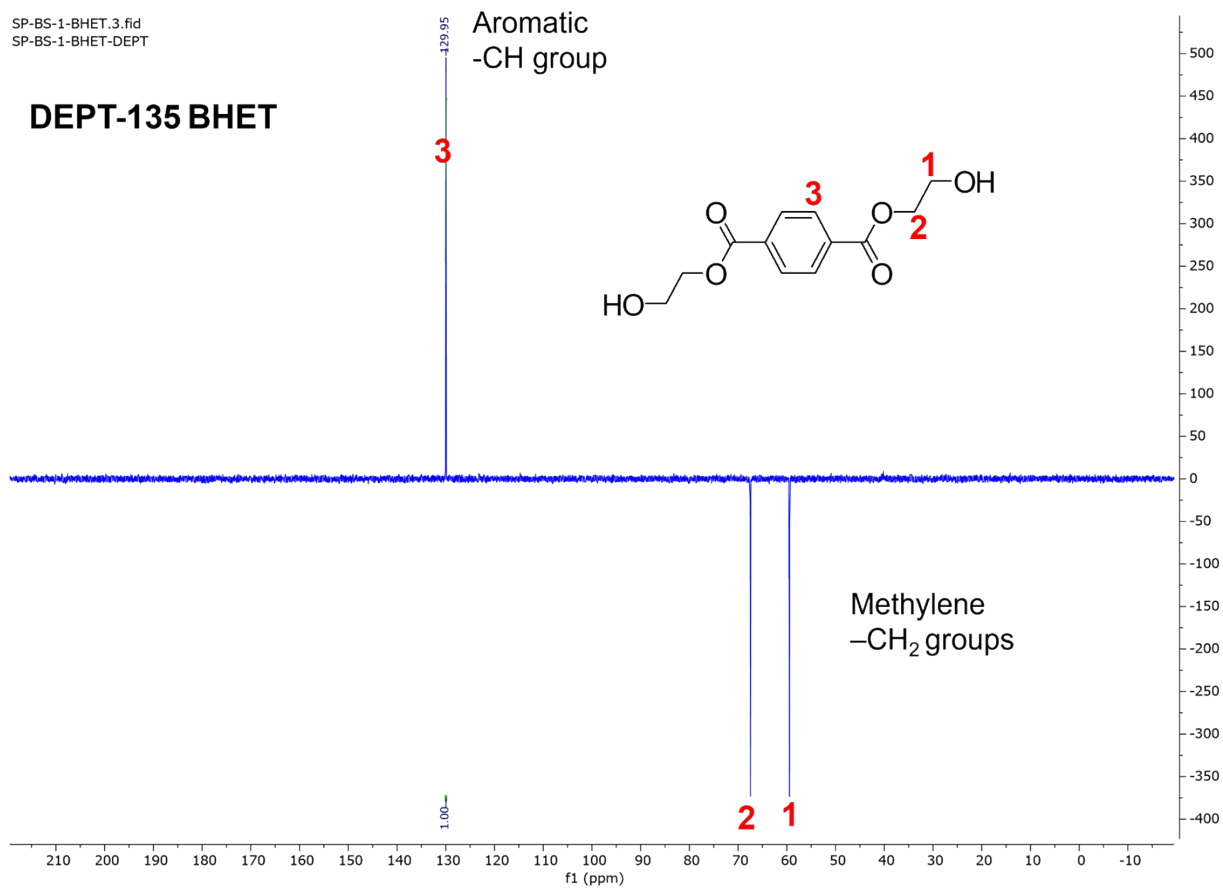

**Fig. S5.** DEPT-135 NMR analysis of BHET monomer.



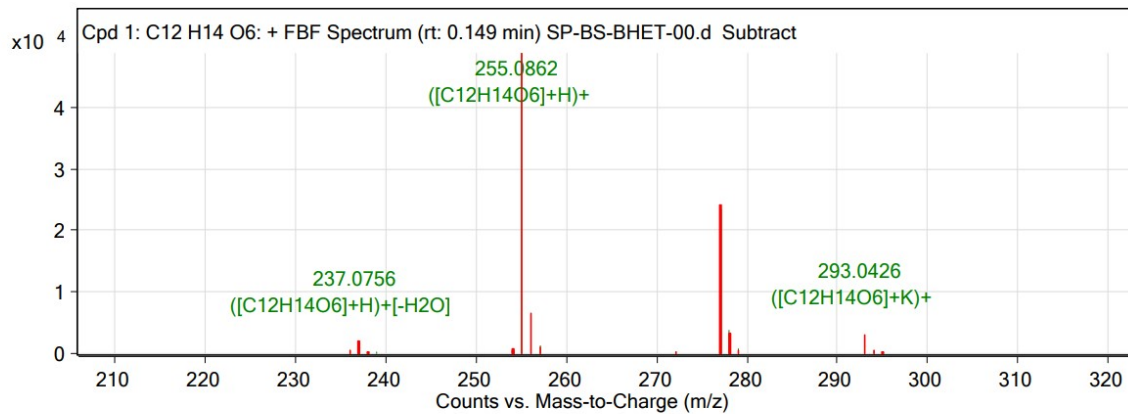

MS Spectrum Peak List

| m/z      | z | Abund    | Formula                                        | Ion                                       |
|----------|---|----------|------------------------------------------------|-------------------------------------------|
| 236.0678 | 1 | 547.95   | C <sub>12</sub> H <sub>14</sub> O <sub>6</sub> | M+ [-H <sub>2</sub> O]                    |
| 237.0756 | 1 | 1616.04  | C <sub>12</sub> H <sub>14</sub> O <sub>6</sub> | (M+H)+ [-H <sub>2</sub> O]                |
| 254.0857 | 1 | 653.1    | C <sub>12</sub> H <sub>14</sub> O <sub>6</sub> | M+                                        |
| 254.0993 | 1 | 400.56   | C <sub>12</sub> H <sub>14</sub> O <sub>6</sub> | (M+NH <sub>4</sub> )+ [-H <sub>2</sub> O] |
| 255.0862 | 1 | 48780.16 | C <sub>12</sub> H <sub>14</sub> O <sub>6</sub> | (M+H)+                                    |
| 256.0901 | 1 | 5695.69  | C <sub>12</sub> H <sub>14</sub> O <sub>6</sub> | (M+H)+                                    |
| 272.1111 | 1 | 289.55   | C <sub>12</sub> H <sub>14</sub> O <sub>6</sub> | (M+NH <sub>4</sub> )+                     |
| 277.068  | 1 | 23501.08 | C <sub>12</sub> H <sub>14</sub> O <sub>6</sub> | (M+Na)+                                   |
| 278.0719 | 1 | 3738.86  | C <sub>12</sub> H <sub>14</sub> O <sub>6</sub> | (M+Na)+                                   |
| 293.0426 | 1 | 2910.35  | C <sub>12</sub> H <sub>14</sub> O <sub>6</sub> | (M+K)+                                    |

Fig. S6. HR-MS analysis of BHET monomer.

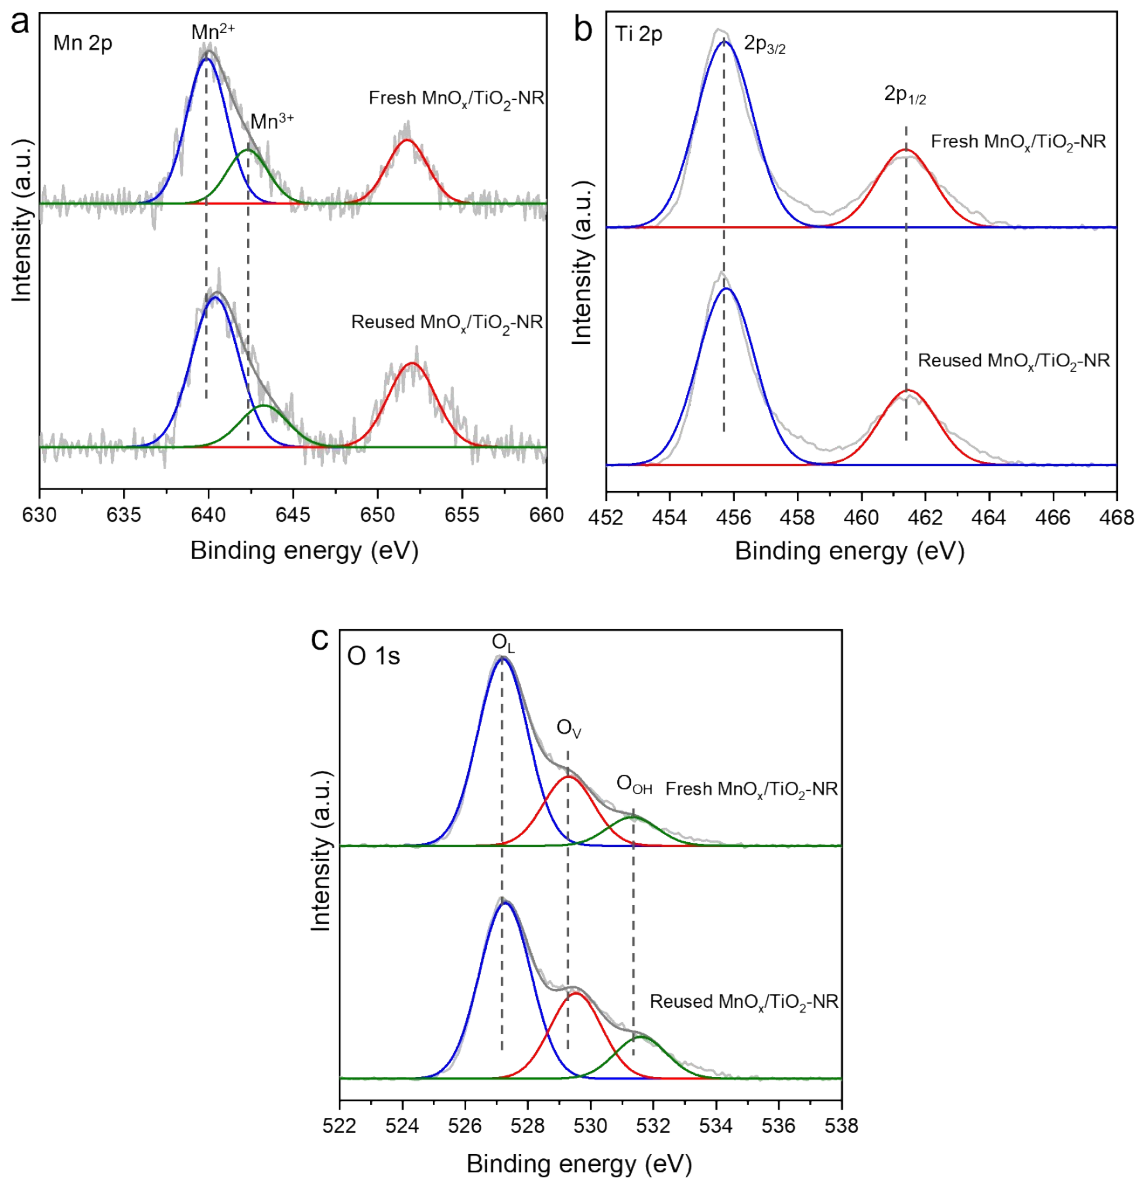

**Fig. S7.** (a) Mn 2p, (b) Ti 2p, and (c) O 1s XPS spectra of fresh and reused  $\text{MnO}_x/\text{TiO}_2\text{-NR}$  catalysts.
